# Supplementary material for: Direct synthesis of isobutyraldehyde from methanol and ethanol on Cu–Mg/Ti-SBA-15 catalysts: the role of Ti
Source: Royal Society of Chemistry journal article supplement (doi:10.1039/c7nj01513e), 2017-01-01
Supplement: c7nj01513e1.pdf [file c7nj01513e1.pdf]

Supplement information

**Table S1. The catalytic performance of the catalyst without Ti doping(Cu-MgO/SBA-15)**

| Reaction time(h) |          | 4    | 6    | 8    | 10   | 12   | 14   |
|------------------|----------|------|------|------|------|------|------|
| Conv.(%)         | methanol | 85.4 | 80.3 | 73.3 | 68.2 | 63.0 | 56.6 |
|                  | ethanol  | 97.7 | 97.6 | 98.3 | 97.9 | 96.5 | 94.7 |
| Sel.(%)          | AD       | 7.78 | 8.33 | 8.07 | 11.8 | 15.7 | 21.1 |
|                  | PD       | 6.33 | 7.41 | 7.07 | 8.30 | 9.89 | 12.0 |
|                  | IBA      | 13.4 | 23.2 | 35.0 | 26.3 | 20.7 | 15.9 |
|                  | MA       | 4.29 | 3.98 | 3.23 | 2.65 | 2.81 | 2.31 |
|                  | EA       | 0.29 | 0.23 | 0.64 | 4.18 | 6.96 | 9.46 |
|                  | POL      | 1.74 | 2.07 | 1.42 | 1.36 | 1.66 | 2.08 |
|                  | IBOL     | 3.60 | 6.52 | 6.81 | 3.38 | 2.56 | 1.99 |

360 °C, 0.1MPa, 3 mL · h<sup>-1</sup> · g<sup>-1</sup>, methanol : ethanol=3:1
